# Supplementary material
Source: MDPI journal article supplement (https://www.mdpi.com/2673-7078/3/1/11)
Supplement: s1 [file s1]

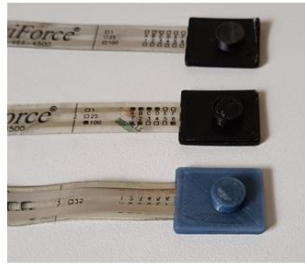

**Suppl. Figure 1:** Photograph of the housings made of the three materials, from top to bottom: ABS, nGenFlex, PLA.

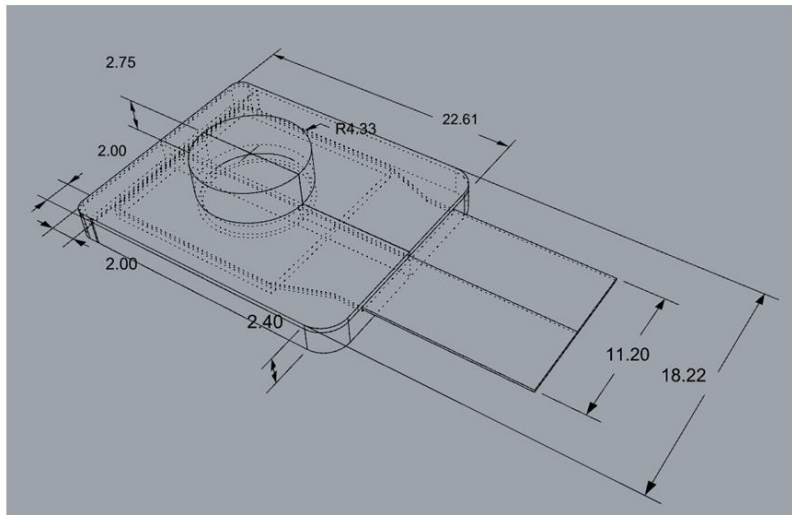

**Suppl. Figure 2** Detailed design of the housing
